# Supplementary material for: Platinum-induced upregulation of ITGA6 promotes chemoresistance and spreading in ovarian cancer
Source: Springer Nature journal article supplement (doi:10.1038/s44321-024-00069-3), 2024-04-24
Supplement: MOESM10 [file 44321_2024_69_moesm10_esm.pdf]

## Expanded View Figures

**Figure EV1. ITGA6 is commonly overexpressed in EOC PT-res cells.**

(A) Graphs reporting the percentage of cell adhesion on different extracellular matrices of TOV-112D and OVSAHO PT-sen and PT-res pools measured by the quantitative cell adhesion CAFCA assay ( $n = 2$  in sextuplicate). Coll IV = Type IV Collagen; Coll I = Type I Collagen; FN = Fibronectin; LNs = Laminins; VN = Vitronectin. (B) Tables reporting the percentage of cells positive for the indicated integrins as measured by flow cytometry (FACS) in PT-sen and PT-res pools of TOV-112D and OVSAHO cells (ITGA1 = Integrin  $\alpha$ 1, ITGA2 = Integrin  $\alpha$ 2, ITGA5 = Integrin  $\alpha$ 5, ITGA6 = Integrin  $\alpha$ 6, ITGAV = Integrin  $\alpha$ V, ITGB1 = Integrin  $\beta$ 1, ITGB3 = Integrin  $\beta$ 3, ITGB4 = Integrin  $\beta$ 4). (C) FACS analyses of the expression profile of ITGB1, ITGB4, and ITGA6 integrins in OVSAHO PT-sen and PT-res clones. (D) Graphs reporting the percentage of cell adhesion on different extracellular matrices of the indicated TOV-112D and OVSAHO PT-sen and PT-res clones. ( $n = 2$  in sextuplicate). (E) Western blot analysis evaluating the expression of ITGA6 protein in tumor samples from the same patients taken at diagnosis (Pre) or at recurrence after chemotherapy (Post). Tubulin was used as loading control. (F) qRT-PCR analysis of ITGA6 mRNA expression in different EOC PT-sen and PT-res cells. (G) Western blot analysis of ITGA6 expression in TOV-112D PT-sen and PT-res clone exposed to a time-course treatment with CHX for the indicated times. Vinculin was used as loading control. (H) Graph reporting the expression of ITGA6 in OVSAHO PT-sen and PT-res cells treated or not with CDDP for 2 h. mRNA was analyzed by qRT-PCR at the indicated time points after CDDP removal. (I) Graphs reporting qRT-PCR analysis of mRNA expression of ITGA6 in TOV-112D ITGA6<sup>HIGH</sup> and ITGA6<sup>LOW</sup> subpopulations treated or not with CDDP. In (F), (H), and (I), mRNA levels were analyzed in triplicate and normalized to actin housekeeping gene and expressed in arbitrary units. In all the graph of the figure statistical significance was determined by a two-tailed, unpaired Student's t-test (Exact  $p$  values were reported on graphs). Bars represent Standard Deviation.

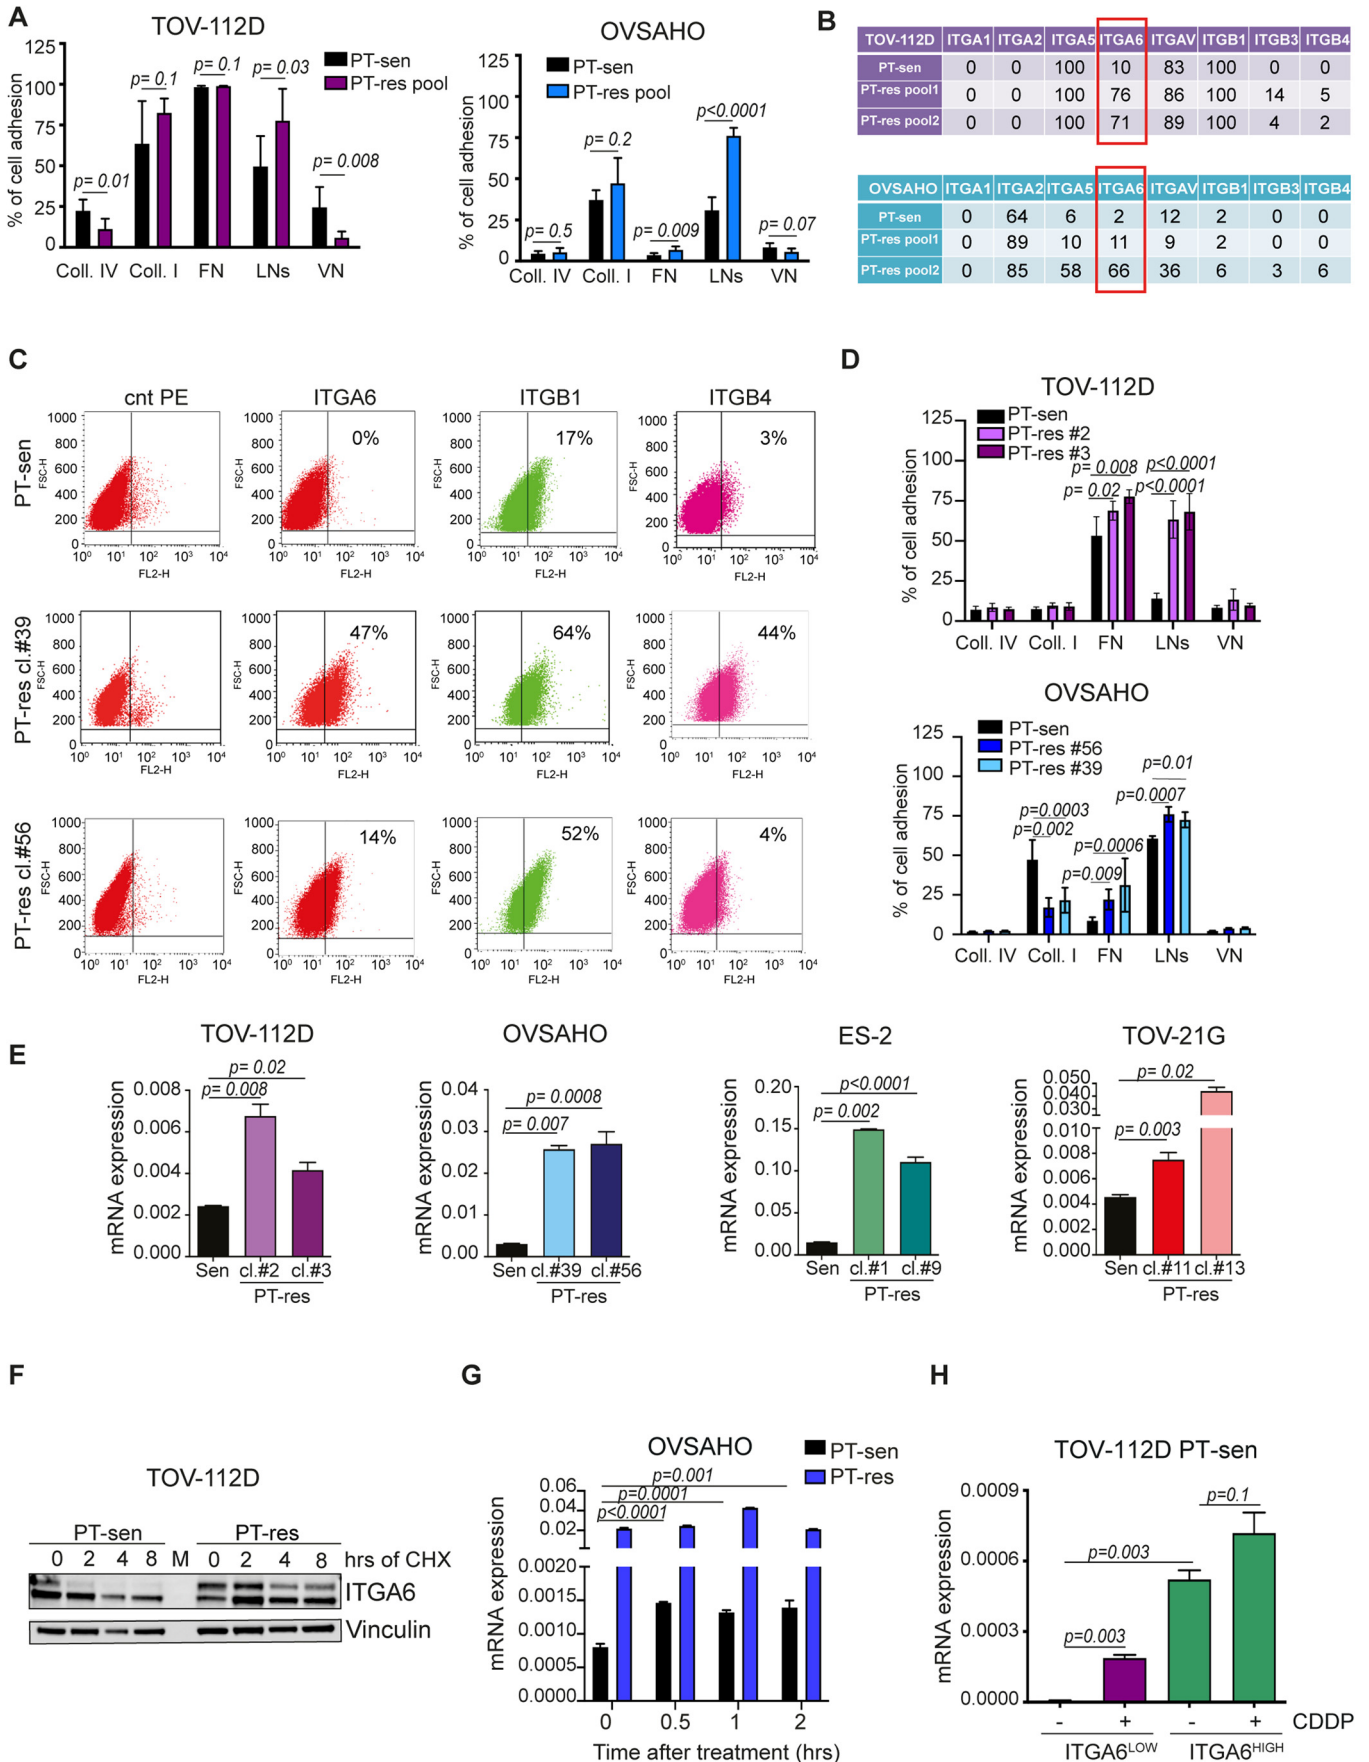

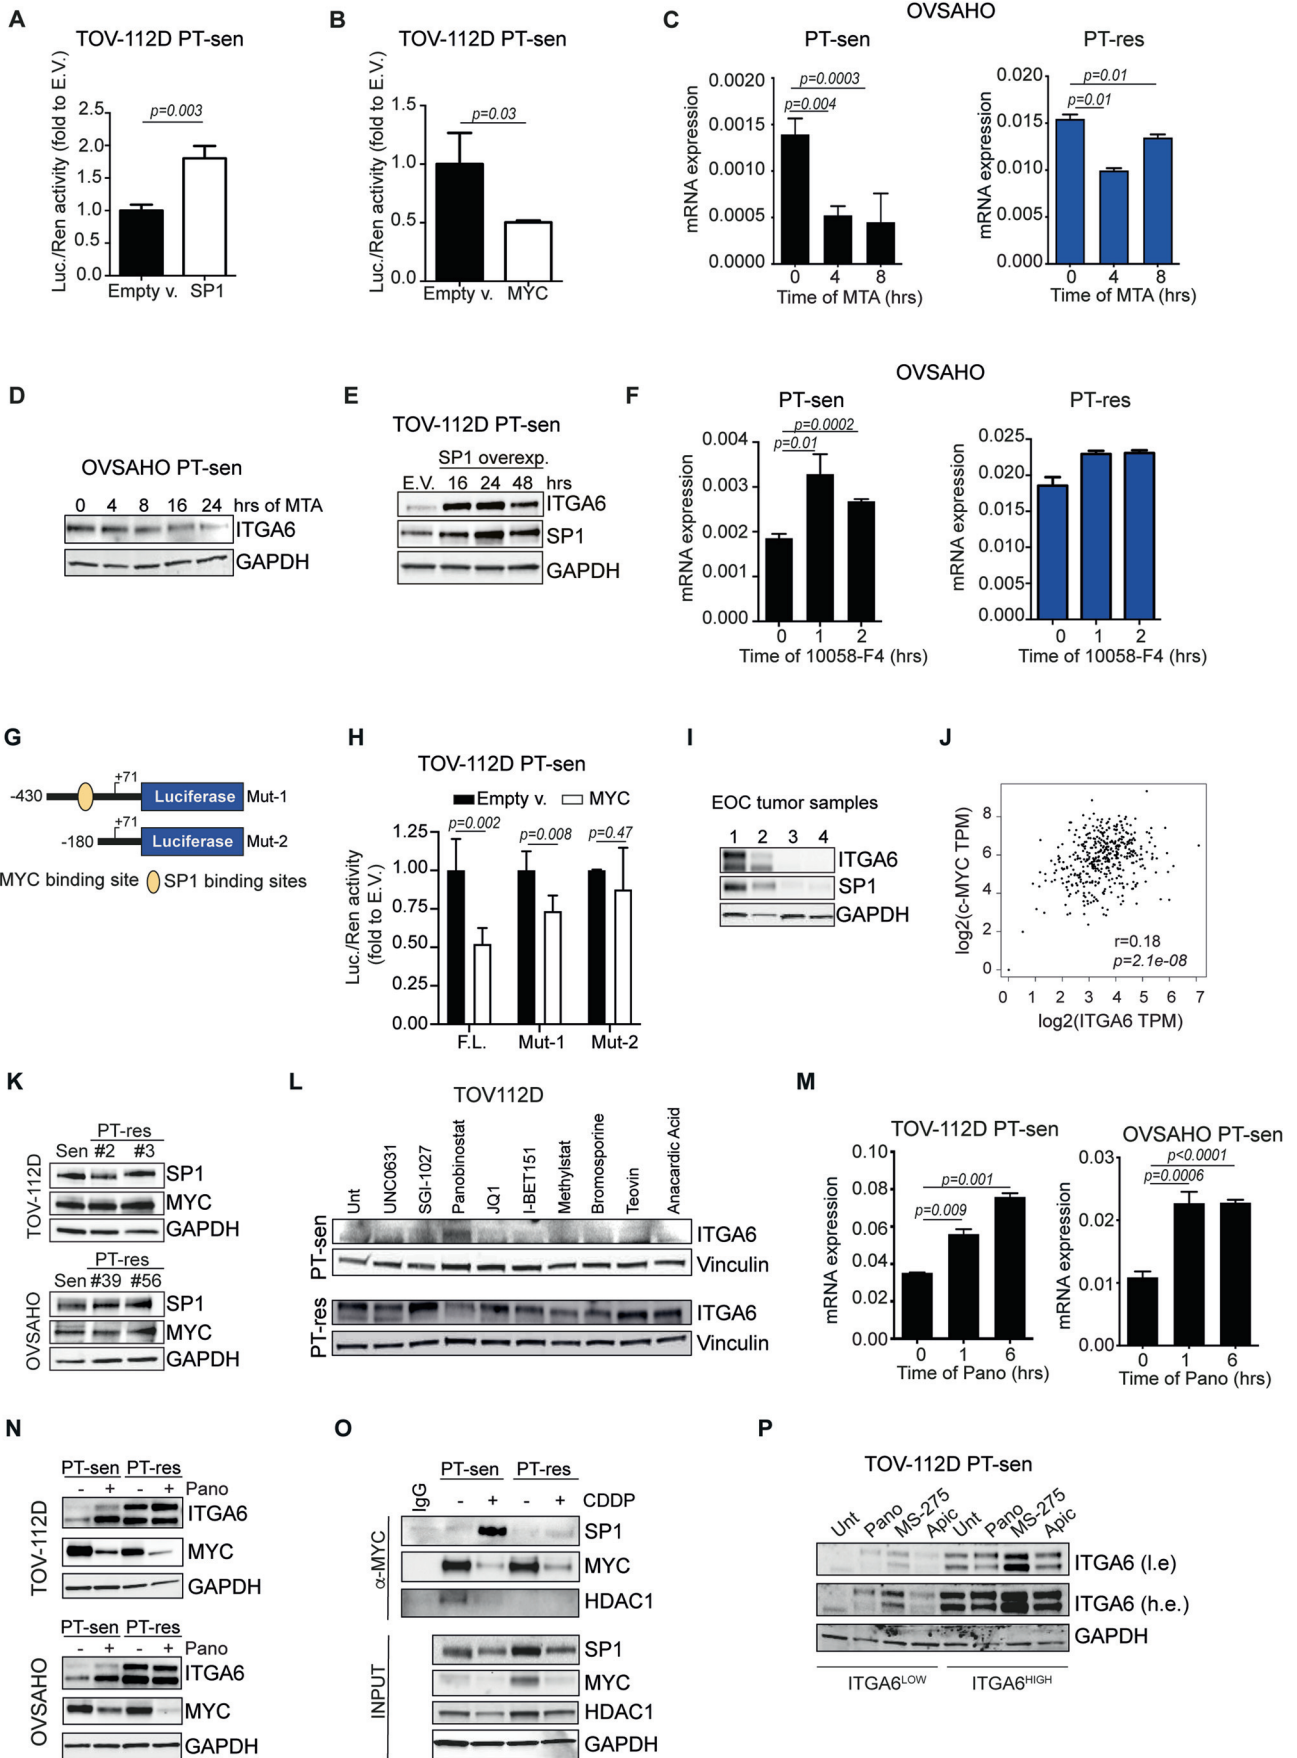

◀ **Figure EV2. SP1/c-Myc/HDAC1 axis regulates ITGA6 transcription after CDDP treatment.**

(A, B) Graphs reporting the luciferase activity measured in TOV-112D PT-sen transfected with ITGA6 promoter full length (FL) together with SP1 (A) or c-Myc (MYC) (B) vectors. In A and B data are the mean ( $\pm$ SD) of three independent experiments. (C) Graphs reporting the expression of ITGA6 in OVSAHO PT-sen (left) and PT-res (right) cells treated with SP1 inhibitor (Mithramycin, MTA). mRNA expression was analyzed by qRT-PCR at the indicated time points. (D) Western blot analysis of ITGA6 expression in OVSAHO PT-sen cells treated with SP1 inhibitor, MTA for the indicated time points. (E) Western blot analysis of ITGA6 expression in TOV-112D PT-sen cells transfected with SP1 vector. Whole lysates were collected at the indicated time points after transfection. (F) Graphs reporting the expression of ITGA6 in OVSAHO PT-sen (left) and PT-res (right) cells treated with the c-Myc inhibitor (10058-F4)). mRNA was analyzed by qRT-PCR at the indicated time points. (G) ITGA6 promoter deletion mutants lacking c-Myc (Mut-1) or both c-Myc and SP1 binding sites (Mut-2) generated for this study. (H) Graph reporting the luciferase activity measured in TOV-112D PT-sen co-transfected with the full length (F.L.) or deletion mutants and the empty (black bars) or c-Myc (MYC, white bars) expression vectors. Data are the mean ( $\pm$ SD) of three independent experiments. (I) Western blot analysis of ITGA6 and SP1 protein expression in EOC tumor samples collected in our Institute (see Appendix Table S1). (J) Spearman's correlation analysis between ITGA6 and c-Myc mRNA expression in TCGA ovarian cancer dataset ( $n = 489$  samples) using the GEPIA online tool. (K) Western blot analysis of c-Myc and SP1 protein expression in TOV-112D and OVSAHO PT-sen and PT-res clones. (L) Western blot analysis of ITGA6 protein expression in TOV-112D PT-sen and PT-res cells treated with a panel of epigenetic modifiers inhibitors for 24 h (UNC0631 and SGI-1027 = methyl transferase inhibitors; Panobinostat = pan-HDAC inhibitor; JQ1, iBET151 and Bromosporine = BET inhibitors; Methylstat = de-methyltransferase inhibitor; Tenovin = SIRT's inhibitor; Anacardic acid = HAT's inhibitor). (M) Graph reporting the mRNA expression of ITGA6 in indicated PT-sen EOC cells treated with Panobinostat (Pano) for 1 and 6 h. mRNA expression was analyzed in triplicate in two biological replicates. (N) Western blot analysis of c-Myc (MYC) and ITGA6 protein expression in TOV-112D and OVSAHO PT-sen and PT-res clones treated or not with Panobinostat for 24 h. (O) Co-immunoprecipitation (Co-IP) analysis of c-Myc, HDAC1, and SP1 in TOV-112D PT-sen and PT-res cells treated or not with CDDP. Input shows the expression of the indicated proteins in the lysates used for IP experiments; IgG represents the control IP using an unrelated antibody. (P) Western blot analysis of ITGA6 expression in ITGA6<sup>HIGH</sup> and ITGA6<sup>LOW</sup> subpopulations treated with different HDACs inhibitors for 24 h (MS-275 preferentially inhibits HDAC1; Apicidin preferentially inhibits HDAC1 and HDAC3). In all western blots of the figure, GAPDH or Vinculin were used as loading control, as indicated. In (C), (F), and (M), mRNA expression was analyzed in triplicate and normalized to actin housekeeping gene and expressed in arbitrary units. In all the graphs of the figure, statistical significance was determined by a two-tailed, unpaired Student's t-test (Exact  $p$  values were reported on graphs). Bars represent Standard Deviation.

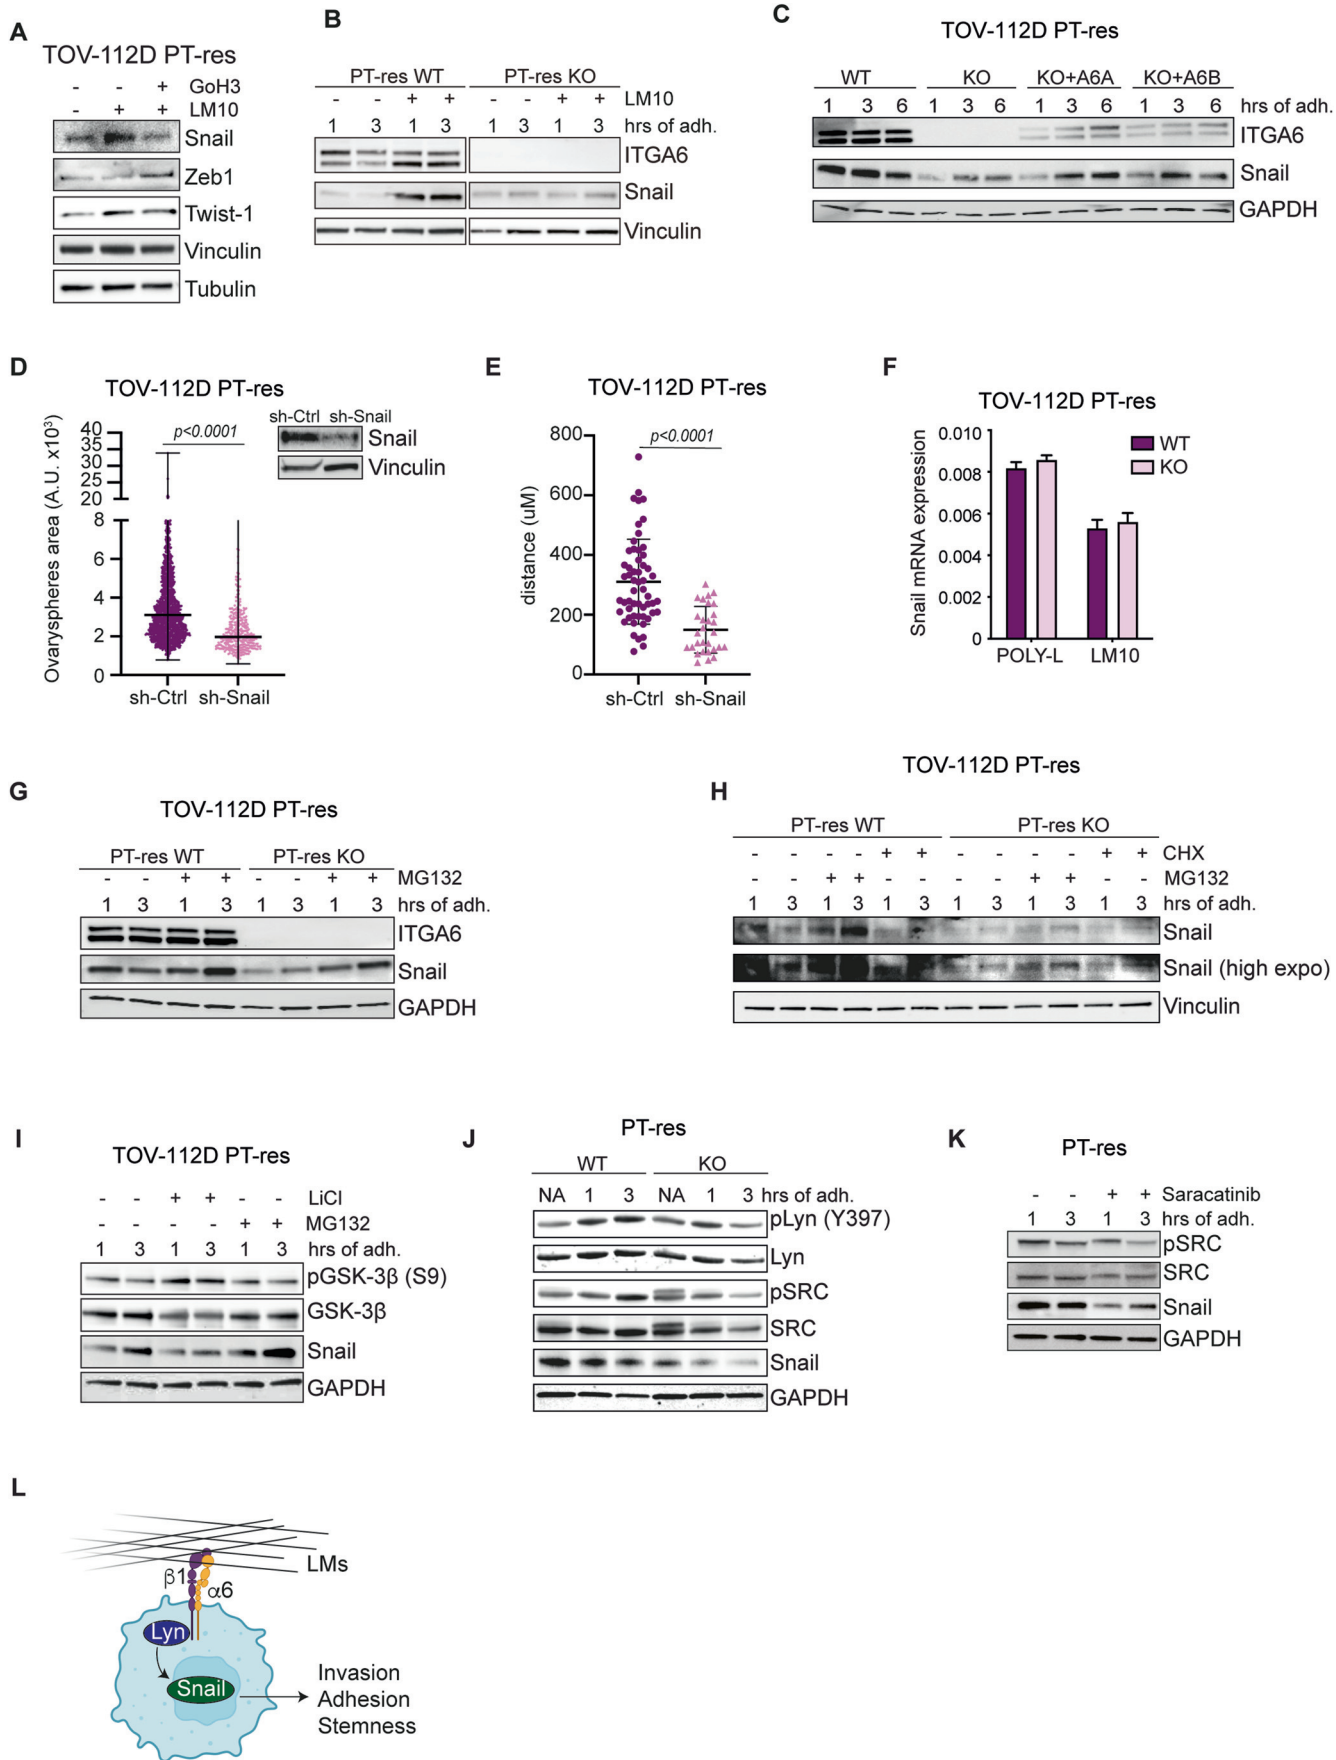

**Figure EV3. ITGA6 engagement modulates Snail expression.**

(A) Western blot analysis of the indicated proteins in whole lysates of TOV-112D PT-res cells plated on LM10 coated dishes in the presence of IgG (as control) or of GoH3 Ab. (B) Western blot analysis evaluating ITGA6 and Snail expression in whole lysates of TOV-112D PT-res ITGA6WT and ITGA6KO cells plated or not on LM10 coated dishes for 1 and 3 h. (C) Western blot analysis evaluating the expression of ITGA6 and Snail in TOV112D PT-res ITGA6WT and KO cells and ITGA6KO transfected with vectors expressing the two isoforms of ITGA6 (isoform A, A6A and isoform B, A6B). Whole lysates were analyzed at the indicated time points after LM10 adhesion. (D) Graph reporting the area of ovaryspheres formed by TOV-112D PT-res cells stably transduced with control shRNA (sh-ctrl) or Snail shRNAs and plated on a mesothelial cell monolayer. In the inset Western blot reports Snail expression in the used cells. Data represent the median ( $\pm$ SD) of three independent experiments performed in triplicate in which at least 150 randomly selected cells were analyzed. (E) Graph reporting the distance covered by the individual cells described in (D), in Matrigel evasion assay calculated starting from the edge of the drop (mean  $\pm$  SD of three independent experiments in which at least 10 randomly selected fields were analyzed). In D and E, statistical significance was determined by a two-tailed, unpaired Student's t-test (Exact *p* values were reported on graphs). (F) qRT-PCR evaluating the mRNA expression of Snail in TOV-112D PT-res cells plated on Poly-lysine (negative control) or on LM10 coated dishes. mRNA expression (mean  $\pm$  SD) was analyzed in triplicate and normalized to actin housekeeping gene expression. (G, H) Western blot analysis evaluating the expression of ITGA6 and Snail in TOV112D PT-res WT and KO cells plated on LM10 for 1 and 3 h and treated or not with the proteasome inhibitor, MG132 alone (G) or with CHX (H). (I) Western blot analysis evaluating the expression of ITGA6 and Snail in TOV112D PT-res ITGA6WT cells plated on LM10 for 1 and 3 h and treated or not with MG132 or with the GSK3 $\beta$  inhibitor, LiCl. (J) Western blot analysis evaluating the expression of the indicated proteins in lysates of TOV-112D PT-res ITGA6WT and ITGA6KO cells plated or not on LM10 coated dishes for 1 and 3 h (NA = not adherent). (K) Western blot analysis evaluating the expression of the indicated proteins in lysates of TOV-112D PT-res ITGA6WT cells plated on LM10 coated dishes for 1 and 3 h in the presence or not of the pan-SRC inhibitor Saracatinib. (L) Schematic representation of obtained results. After adhesion to LM10, ITGA6 activates Lyn/Src pathway and regulates Snail protein stability to mediate invasion, adhesion, and stemness of tumor cells. In all western blots of the figure, GAPDH, Tubulin, or Vinculin were used as loading control, as indicated.

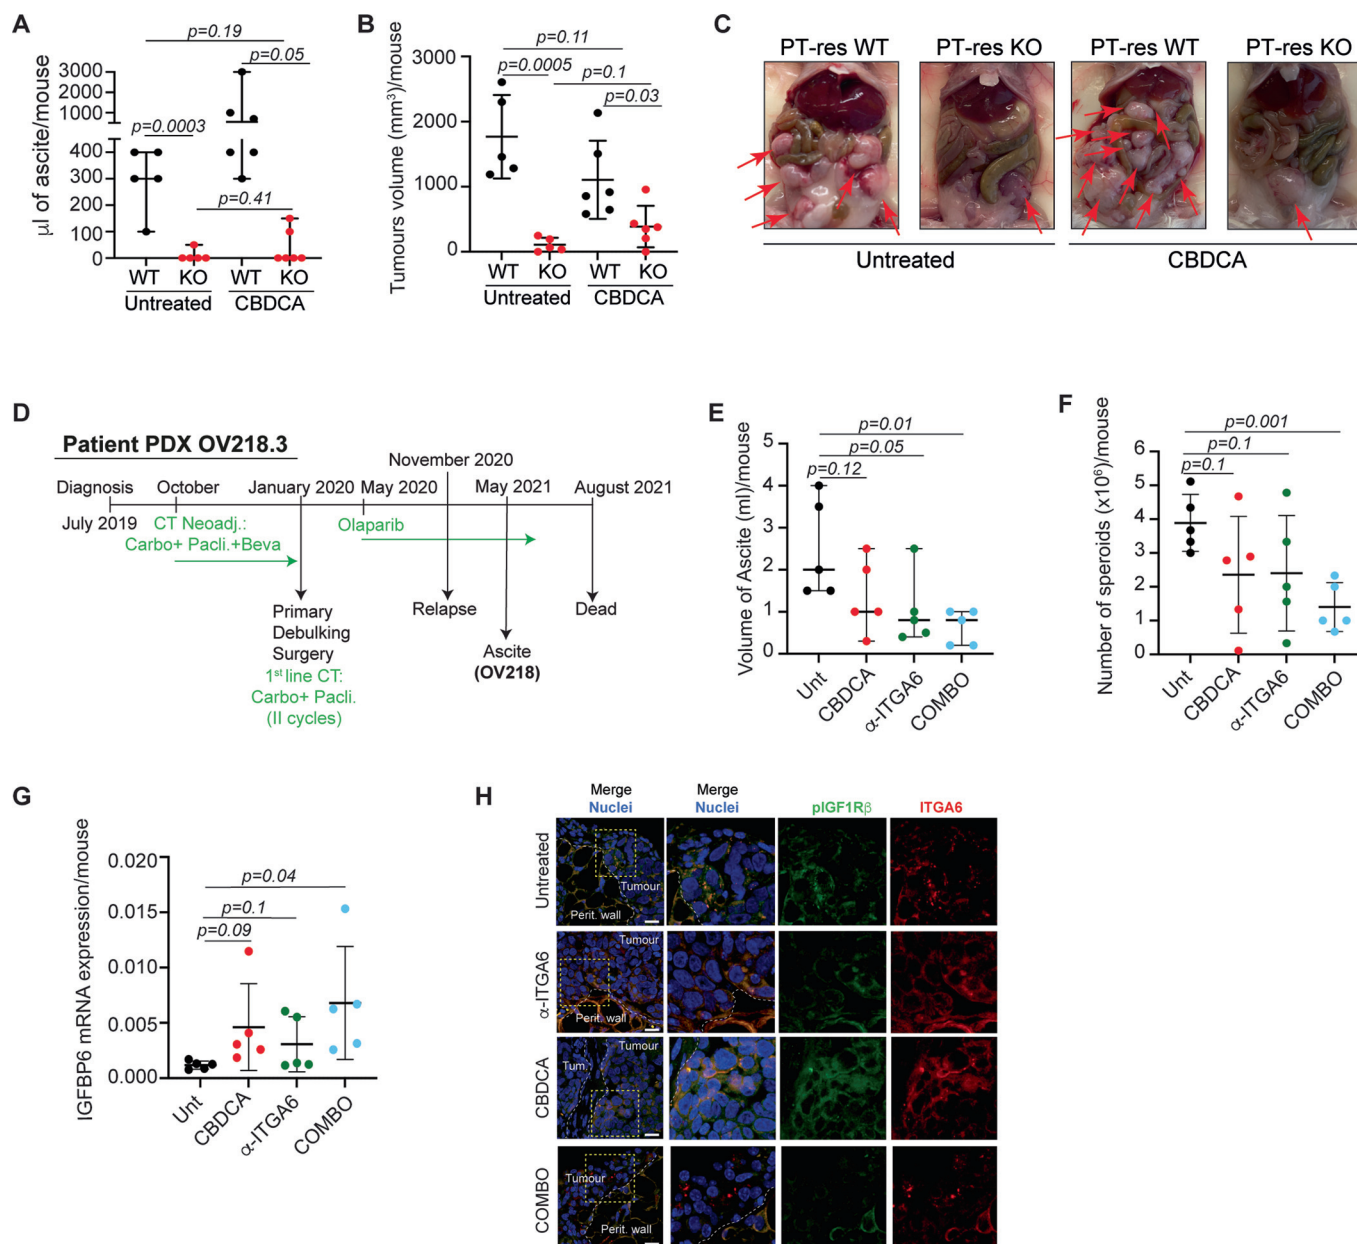

**Figure EV4. ITGA6 is a druggable target necessary for in vivo cell spreading and response to PT.**

(A, B) Graph reporting the volume of ascitic fluids (A) and of explanted macroscopically identified tumors of NSG mice injected intraperitoneally with PT-res ITGA6 WT ( $n = 11$ ) and KO cells ( $n = 11$ ) and treated ( $n = 6$ ) or not ( $n = 5$ ) with CBDCA 30 mg/kg 3 times per week for 2 weeks. (C) Typical images of mice described in (A) and (B). Red arrows indicated the presence of macroscopically visible tumors. (D) Clinical history reporting the timeline of surgery, chemotherapy treatments (in green) and ascites collection of EOC patient who donate her ascites to establish PDX OV218.3 (see Methods section). (E, F) Graph reporting the volume of ascitic fluids (E) and number of tumor spheroids (F) in NSG mice ( $n = 5$ /group of treatment) injected with PDX OV218.3 and treated or not with the specific anti-ITGA6 blocking antibody P5G10, with CBDCA or with the combination of both according to the scheme reported in Fig. 6H. (G) IGFBP6 mRNA expression in tumor cells in ascites of mice described in (E, F). mRNA expression was analyzed in triplicate and normalized to actin housekeeping gene expression. The mean ( $\pm$ SD) expression for each mouse is reported in the graph. (H) IF analyses evaluating the expression of pIGF1R $\beta$  (green) and ITGA6 (red) on peritoneal metastases collected from mice treated as indicated (nuclei are in blue). White dashed lines indicate the boundary between tumor masses and the peritoneal wall. Yellow dashed boxes represent the areas magnified in the zoomed images, on the right. Scale bars = 20  $\mu\text{m}$ . In the figure, statistical significance was determined by a two-tailed, unpaired Student's t-test (Exact  $p$  values were reported on graphs). Bars represent Standard Deviation.
